# Supplementary material for: Data-based investigation of the effects of canopy structure and shadows on chlorophyll fluorescence in a deciduous oak forest
Source: Copernicus journal article supplement (doi:10.5194/egusphere-2023-2419), 2023-10-25
Supplement: Supplementary file [file egusphere-2023-2419-AC2-supplement.pdf]

Responses to comments: our replies are all in blue color.

Referee #2:

Dear,

We would like to thank you for taking your time to evaluate our work and foremostly for your interesting and useful comments and questions.

We tried to answer your interesting questions and comments (all answers and changes are in blue color).

General comments:

They find the relative difference between Solar-induced and LED-induced fluorescence in a forest site. The interesting point from the presented RF model is the significance of blue and other visible wavelengths to the explanation of Solar/LED yield relationship( $\phi_k$ ). Since equation 6 also consisted of  $f_{APAR} \times f_{esc}$ , the blue band, and other factors might be an alternative approach for  $f_{esc}$  prediction, too. One of the questions is how to prove the mechanisms of blue band contribution to shadow fraction from observed data (maybe with monitoring camera data). Another point is reproducibility. A justification for diurnal  $F_{yieldLIF}$  is lacking in explanation. The reduction in the afternoon fluorescence with LIF might be linked to those of GPP or leaf-level photosynthesis. If the relationship between  $F_{yieldLIF}$  and the Light-Use-Efficiency of GPP is weaker than  $SIF_y$ , the theoretical point will be unsolved.

We found in our study that the blue band contributes to  $\phi_k$  prediction.  $\phi_k$  is theoretically the product of  $f_{APAR}$  and  $f_{esc}$ . However, in this study with the available measurements we cannot disentangle  $f_{APAR}$  and  $f_{esc}$  signals. From our point of view, disentangling these two variables will require modelling approaches.

In this manuscript, we focused on the effects of canopy structure and sun-canopy geometry on passive and active chlorophyll fluorescence signals. We have also investigated whether these effects can be explained by variables accessible by remote sensing. In a work in progress, we are investigating the link between chlorophyll fluorescence and GPP and abiotic variables. An article on these subjects will be submitted shortly (see also our responses to L29 comment below). However, the links between  $F_{yieldLIF}$  and LUE are complex at the diurnal scale. These relationships were not explored in this study. There are references that showed strong relations between  $F_{yieldLIF}$  measurements and photosynthesis (Flexas et al., 2002; Schreiber et al., 1983).

Specific comments

>Table1

If the SAA is a variable of degree or radian, those can be increasing clockwise to west. In what kind of case does the sun/shade fraction increase/decrease westward? I guess those are not homogenous canopy bidirectional reflectance assumptions. If the illumination angle should be normalized to the principal plane of excitation light, the cosine of (SAA) can be a more realistic factor. Figure 4 indicates the importance of SZA and SAA in the RF model, and those definitions should be clearly and logically defined.

The FOV of our experiment site has a complex canopy structure that can affect the light repartition within and above the canopy. We agree that we could have used the cosine of the

angle instead of the angle itself. However, Random Forest models handle non-linearities related to input variables computation and correlations between variables. We believe that RF results are easier to interpret by using the angle directly as an input, without prior transformation. The relative importance of input variables is independent from input variables units.

Abstract

>L27: geometry effects compared to  $F_{\text{yieldLIF}}$ .

The geometry effect on LIF is addressed less in the paper. Is there any effect of shade fraction (Figure S5) before the blue LED flash on FOV? Continuously shaded leaves would react differently to other leaves under flash, and those can cause uncertainty on the  $F_{\text{yield}}$ .

Our LIF instrument is based on the PAM technique (but without saturation flashes) (Schreiber, 1986) where chlorophyll fluorescence is induced by non-actinic LED pulses that allow fluorescence-sensing on dark-adapted, shaded and non-shaded leaves without altering  $F_{\text{yield}}$  (for more details, see Baker et al., 2008; Moya et al., 2019).

>L29:

Could you briefly explain the implication of fluorescence seasonality? Why decreasing? Does it relate to increasing stress factor or light response to quantum yield which is related to the photochemical system openness?

Many factors can explain the seasonal variations in  $F_{\text{yieldLIF}}$  and its decreasing trend. Among these factors, we have the plant photoprotective mechanism known as non-photochemical heat dissipation, the decline in chlorophyll pigment content of the leaves, and abiotic conditions such as heatwaves and water stress. In our study, there is no clear evidence that supports this. But, it is worth mentioning that during the heatwaves of summer 2022, notably in mid-June, mid-July and in the beginning of August  $F_{\text{yieldLIF}}$ , SIF and GPP have strongly decreased due to an increase in atmospheric water demand (as mentioned above a new manuscript centred on these questions will be submitted soon- Balde et al. in preparation).

Also, a discussion of L486 mentioned  $F_{\text{yieldLIF}}$  also explained by leaf biochemical and solar angles. Why solar angle is here even though the author assumes LIF output is free from geometric factors?

This might be a misunderstanding: in L486, it is well mentioned that “the seasonal variability of  $\text{SIF}_y$  is driven by the seasonal changes in leaf biochemical properties and solar zenith and azimuth angles. These factors” (meaning leaf biochemical properties) “can also drive the seasonal dynamics in  $F_{\text{yieldLIF}}$ ”. This is what we wanted to express. This last sentence will be reformulated as “The leaf biochemical properties can also drive the seasonal dynamics in  $F_{\text{yieldLIF}}$ , leading to a better correlation”.

>L30

R-NIR can be rewritten as R850. A hyphen symbol is sometimes confusing.

Thank you for this remark! R850 will be written as R-NIR in the paper.

>L30: the product of NIR by the normalized difference vegetation index

Grammar correction: The Product of A and B.

The correction is considered.

>L190

As far as I know, the optical system called SIF3 with HR1-T sensor is newly developed. Do you have a plan to publish a more detailed explanation of assembly, function, ability to detect signals, and so on? Also, this paper should include the figures of calibration processes, and calibrated spectra (plot of radiance and wavelengths) from upward and downward irradiance at the start and end of the season. Dark current to signal stability is not shown. There is no evaluation of Signal to Noise Ratio. Also, the retrieval uncertainty of SIF should be assessed among different approaches (e.g., iFLD, SFM, BSF, SVD.....) compared with the presented 3FLD. It is recommended to enhance the reliability of the findings (especially on a diurnal variation on the O2A band, e.g., van der Tol et al 2023 RSEvol284,113304).

We completely agree that a detailed description of the SIF3 instrument has to be presented. As this paper could not contain all these details, a dedicated paper is currently under preparation by co-authors .

>L275

Please add the figure of upwelling radiance spectra at 757.86, 760.51, and 770.46 nm.

This is a very interesting proposal. The upwelling radiance and downwelling irradiance will be provided in the paper dedicated to SIF3 description.

>L282

Eq (4) can be  $=R850 \times NDVI$ . Misspelling?

The R850 will be replaced as R-NIR in the paper.

>L300

Why  $\phi_k$ ?

There is no clear reason to choose the SIF/LIF ratio consisting of phi ( $\phi$ ) and k. If we look at the previous research on this topic,  $\phi$  has been used for quantum yield. It seems confusing.

$\phi_k$  represents the contribution of the canopy structure and sun geometry effects on the SIF signal. Further, the  $\phi_k$  allows to retrieve the apparent fluorescence yield of SIF. This is why we call the ratio SIF/LIF  $\phi_k$ .

>L 555

Any references to blue band contributions?

>Supplementary

Figure S7 shows  $F_{\text{yieldLIF}}$  is decreasing from morning to afternoon, and the author explained it is derived by activation of dissipation on leaf scale. How could you explain why those are independent of the canopy structural effect? As is shown in Fig S5, the diurnal sun rotation would affect the fraction of sunlit leaves when the instrument was targeting heterogeneous canopy objects. I doubt the diurnal variation of LIF is also a variable of the sunlit fraction, rather than simply explained by hemispherical integrated PAR, especially on a clear sunny day. Thus, additional analysis for the sunlit fraction of LIF would help to minimize uncertainty on target mismatch.

The continuous decline in  $F_{\text{yieldLIF}}$  from morning to afternoon could be sustained by the activation of the non-photochemical quenching for the dissipation of the excess light energy induced by the high level of incoming radiation. This assumption should be demonstrated by leaf-level measurements that we are highly interested to explore in the future. The shaded leaves fraction could also have an indirect effect on  $F_{\text{yieldLIF}}$  via photosynthesis, but this effect would be minor compared to the one due to the non-photochemical heat dissipation.
